# Supplementary figures and images for: Facilitators and Barriers to Lung Cancer Screening during Long COVID: A Global Systematic Review and Meta-Study Synthesis of Qualitative Research
Source: MDPI journal article supplement (doi:10.3390/ijerph21050534), 2024-04-25

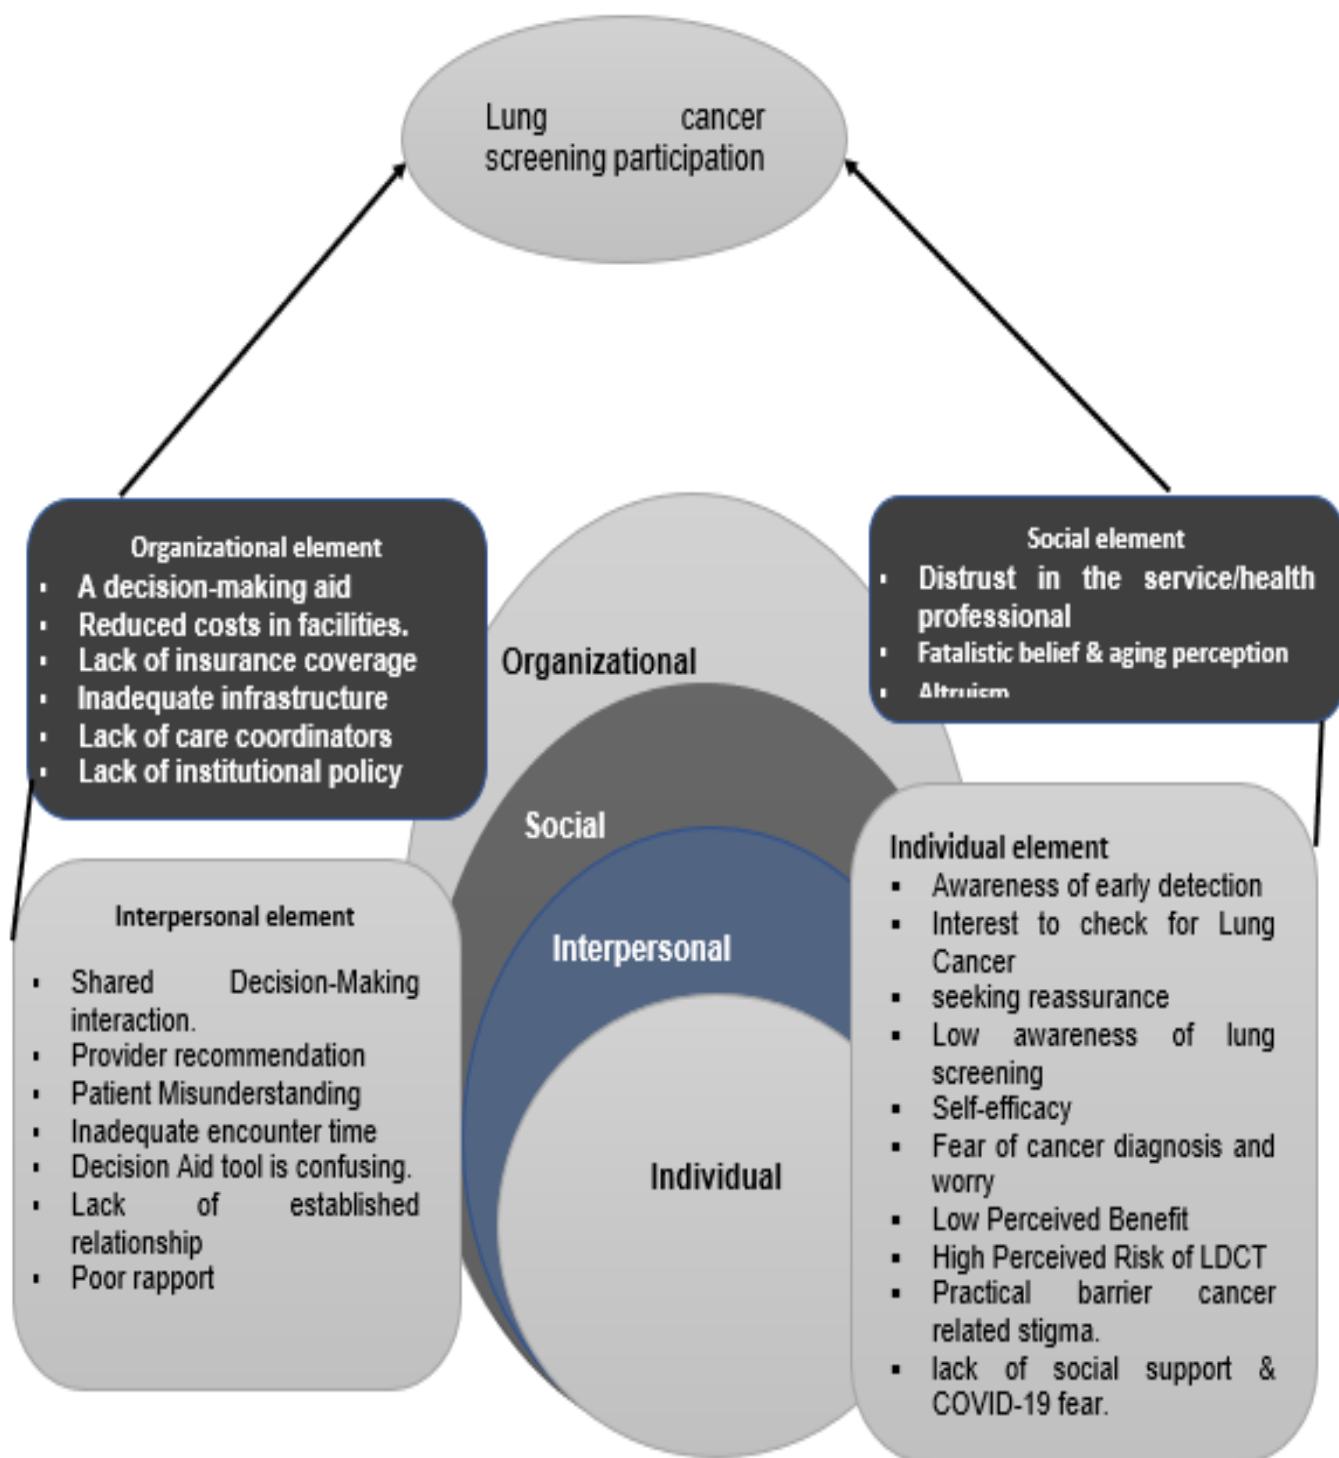

**Figure S1.** A conceptual framework of factor influence to participate lung cancer screening.

Supplement: s1 [file s1]
